# Supplementary material for: Predictors of survival in patients undergoing oropharyngeal surgery for cancer recurrence after radiation therapy
Source: Springer Nature journal article supplement (doi:10.1007/s00405-020-05913-z), 2020-03-19
Supplement: MOESM1 [file 17815340]

| **Supplemental Table 1: Multivariate Analysis for 5-year OS and DSS for Subgroup Analysis (Primary OP Disease Only)** | | | | | |
| --- | --- | --- | --- | --- | --- |
|  | | **OS** | | **DSS** | |
| Parameter | | HR (95% CI) | p-value | HR (95% CI) | p-value |
| Primary Neck Dissection | No (Reference) | - |  | - |  |
| Yes | 0.37 (0.13-0.94) | 0.04a | 0.38 (0.12-1.2) | 0.09 |
| Tobacco | Never Smoker (reference) | - |  | - |  |
| Former or Current Smoker | 3.3 (1.2-8.9) | 0.02a | 4.9 (1.4-17) | 0.01a |
| Adjuvant Radiationb | No | - |  |  |  |
| Yes | 0.10 (0.01-0.84) | 0.04a | 0.12(0.01-0.93) | 0.04a |
| BMIc | > 20 | - |  | - |  |
| < 20 | 3.2 (1.4-7.6) | 0.006a | 3.1 (1.1-8.9) | 0.03a |
| cN (Recurrence)d | cN0 (reference) | - |  | - |  |
| cN+ | 2.3 (1.0-4.9) | 0.04a | 3.0 (1.2-7.8) | 0.02a |
| Class | Class I (reference) | - |  | - |  |
| Class II | 0.54 (.21-1.4) | 0.20 | 0.50 (0.16-1.6) | 0.23 |
| Class III | 1.43 (0.50-4.1) | 0.51 | 2.0 (0.61-6.7) | 0.25 |
| Class II (reference) | - |  | - |  |
| Class III | 2.7 (1.2-5.9) | 0.02a | 4.1 (1.6-11) | 0.004a |
| a significance based on p-values < 0.05  b After salvage surgery with negative margins | | | | | |
